# Supplementary material
Source: PubMed Central journal article supplement (PMC5135586)

# Supplemental Figure 7

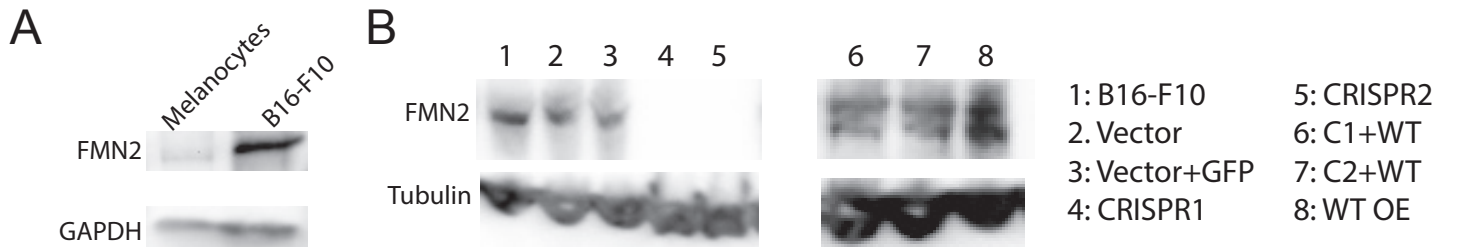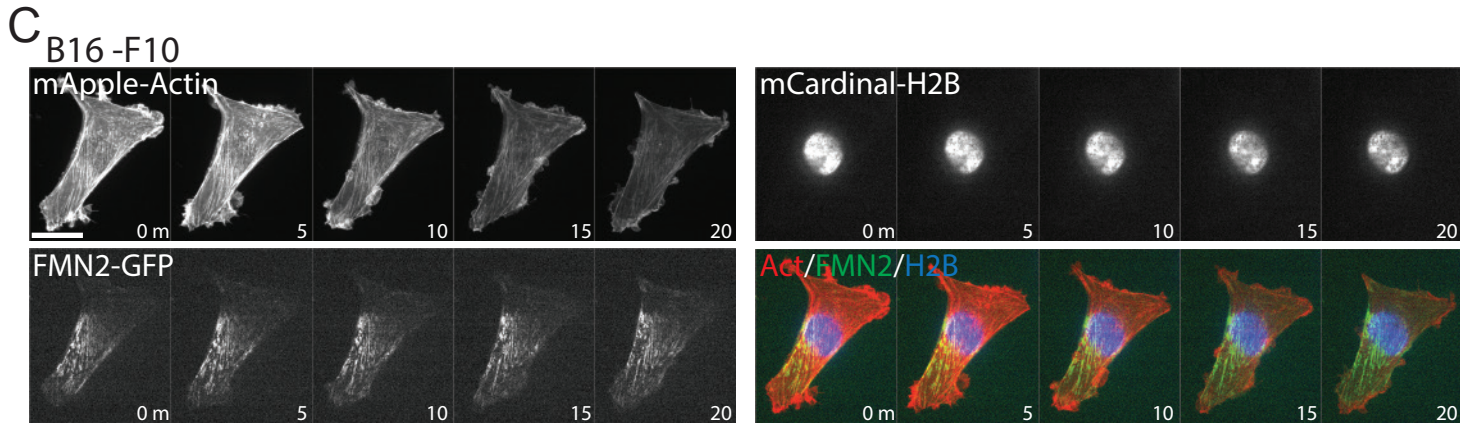

**D**

| B16-F10 Cell Lines                     | Figure(s)                       |
|----------------------------------------|---------------------------------|
| <b>B16-F10</b>                         | Figure 7A, C-H; Figure S7A-H    |
| <b>Cas9 Vector (Vector)</b>            |                                 |
| Clone 1                                | Figure 7C-D; Figure S7B, F      |
| Clone 2                                | Figure 7D; Figure S7F           |
| <b>Cas9 Vector+GFP (Vector+GFP)</b>    |                                 |
| Clone 1                                | Figure 7C-D; Figure S7B, F      |
| Clone 2                                | Figure 7D; Figure S7F           |
| <b>FMN2 Overexpression (WT OE)</b>     |                                 |
| Clone 1                                | Figure 7C-H; Figure S7B, D, F-H |
| Clone 2                                | Figure 7D; Figure S7F           |
| <b>CRISPR Oligo Set 1 (CRISPR1)</b>    |                                 |
| Clone 1                                | Figure 7B-H; Figure S7B, D-H    |
| Clone 2                                | Figure 7D; Figure S7F           |
| <b>CRISPR Oligo Set 2 (CRISPR2)</b>    |                                 |
| Clone 1                                | Figure 7C-D; Figure S7B, F-H    |
| Clone 2                                | Figure 7D; Figure S7F           |
| <b>CRISPR Oligo Set 1+FMN2 (C1+WT)</b> |                                 |
| Clone 1                                | Figure 7C-H; Figure S7B, F-H    |
| Clone 2                                | Figure 7D; Figure S7F           |
| <b>CRISPR Oligo Set 2+FMN2 (C2+WT)</b> |                                 |
| Clone 1                                | Figure 7C-D; Figure S7B, F-H    |
| Clone 2                                | Figure 7D; Figure S7F           |

**E**

|                                           | MEF                | B16-F10            |
|-------------------------------------------|--------------------|--------------------|
| <b>FMN2 Localization</b>                  | Perinuclear Fibers | Perinuclear Fibers |
| <b>Perinuclear Actin</b>                  | Present            | Present            |
| <b>Growth Rate (+/-FMN2)</b>              | No Difference      | No Difference      |
| <b>Binucleate Cells (+/-FMN2)</b>         | No Difference      | No Difference      |
| <b>Migration Speed (+/-FMN2)</b>          | No Difference      | No Difference      |
| <b>Directional Persistence (+/-FMN2)</b>  | No Difference      | N/A                |
| <b>Transwell Assay</b>                    |                    |                    |
| <b>Number of Cells (+/-FMN2)</b>          | -FMN2: Fewer Cells | -FMN2: Fewer Cells |
| <b>DNA Damage (+/-FMN2)</b>               | -FMN2: More Damage | -FMN2: More Damage |
| <b>Invasion Assay (Matrigel; +/-FMN2)</b> | N/A                | -FMN2: Fewer Cells |

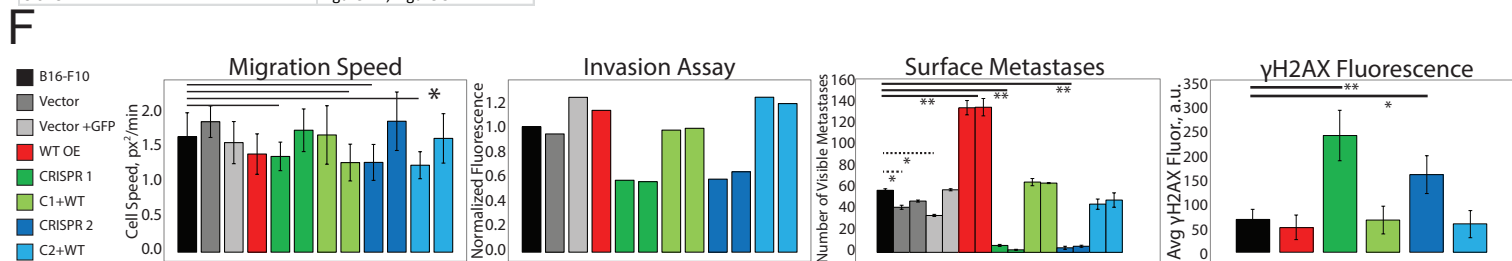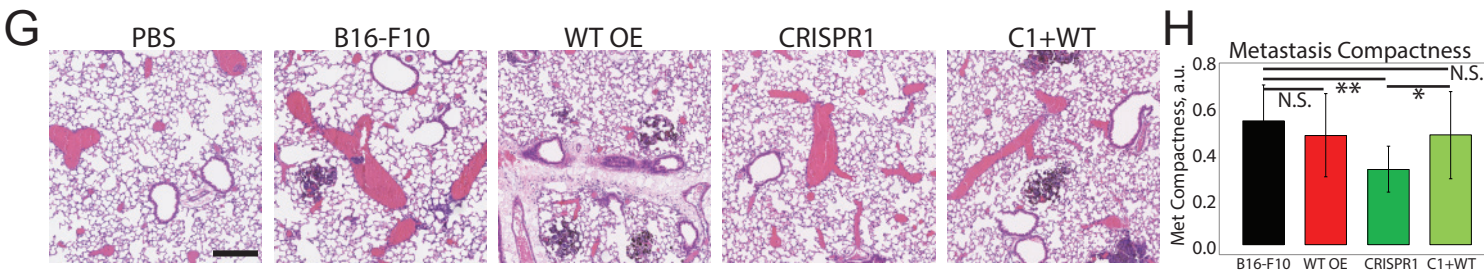

Supplement: NIHMS824113-supplement-14.pdf [file NIHMS824113-supplement-14.pdf]
