# Supplementary material
Source: PubMed Central journal article supplement (PMC5135586)

# Supplemental Figure 3

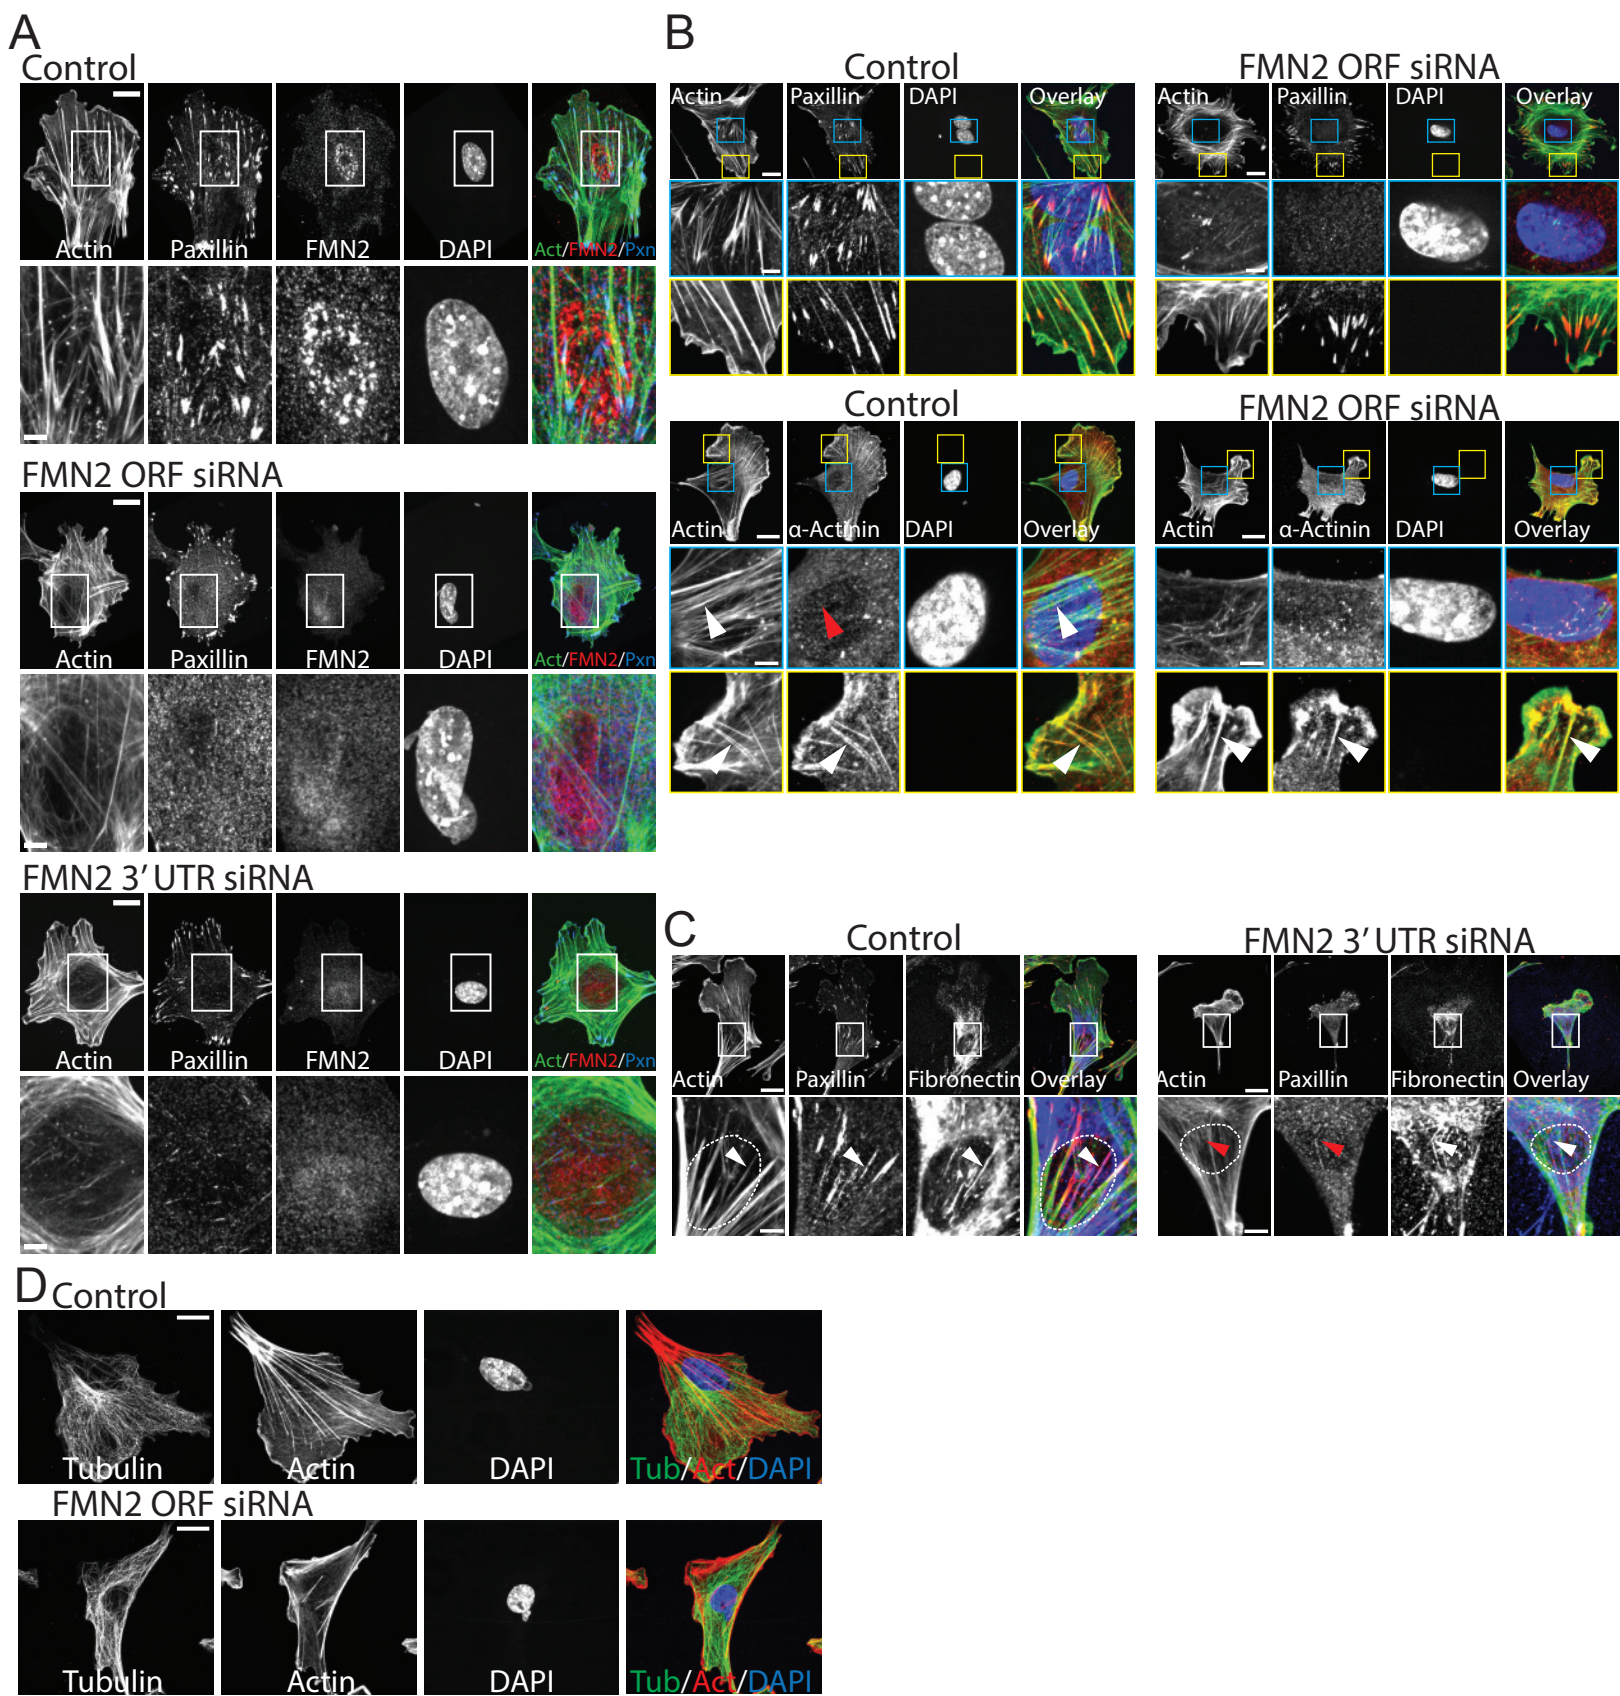

Supplement: NIHMS824113-supplement-10.pdf [file NIHMS824113-supplement-10.pdf]

# Supplemental Figure 4

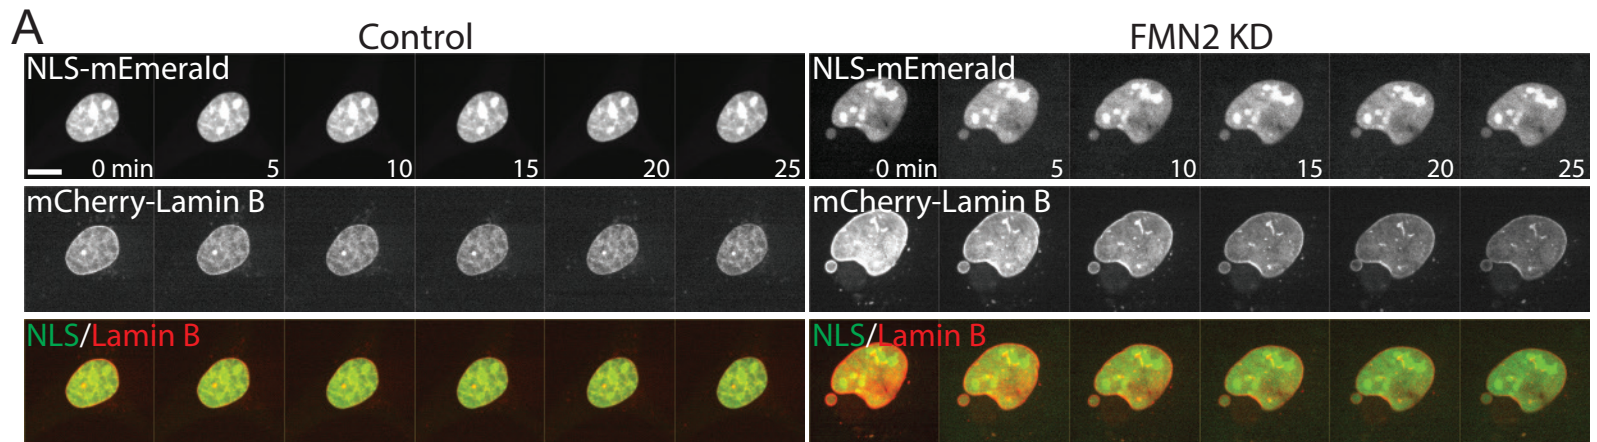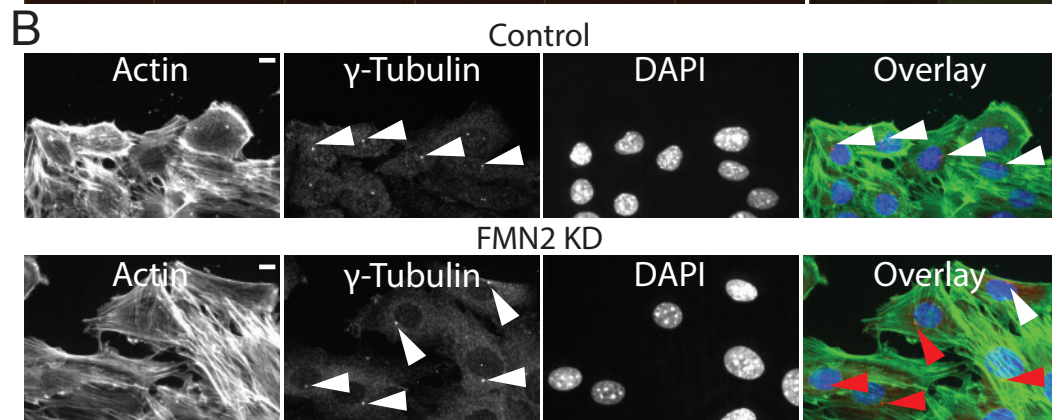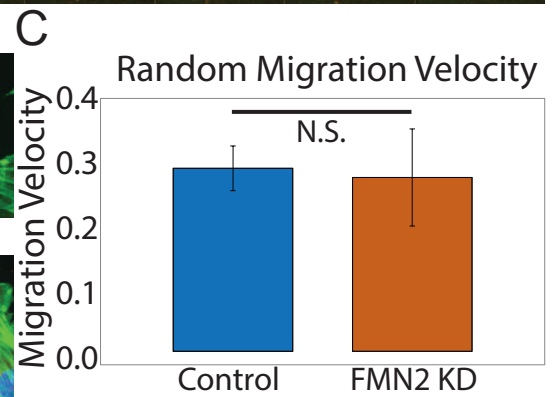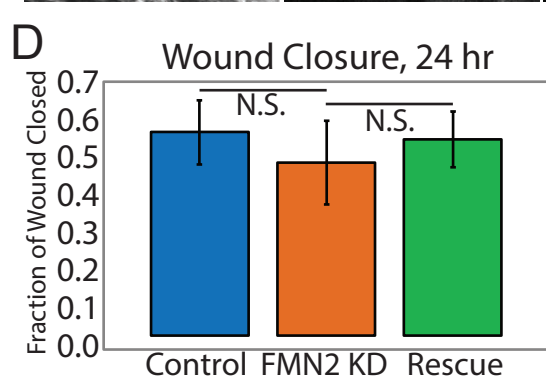

Supplement: NIHMS824113-supplement-11.pdf [file NIHMS824113-supplement-11.pdf]

# Supplemental Figure 5

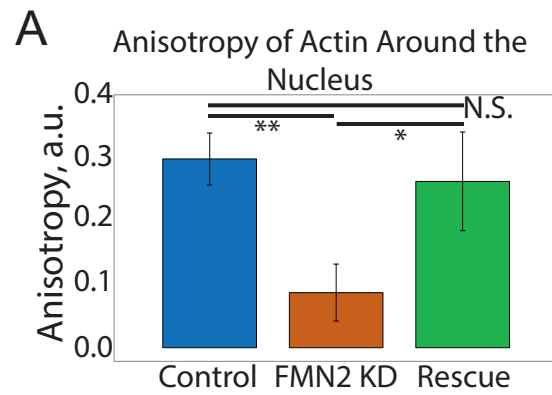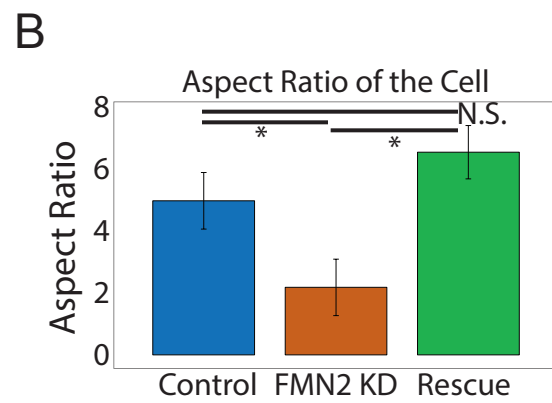

Supplement: NIHMS824113-supplement-12.pdf [file NIHMS824113-supplement-12.pdf]

# Supplemental Figure 6

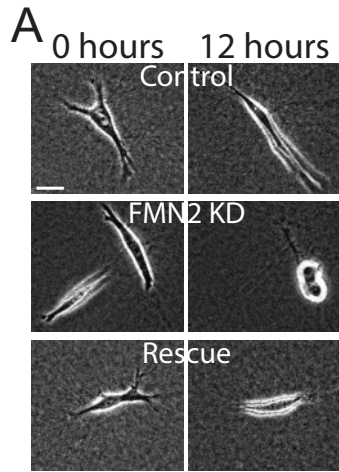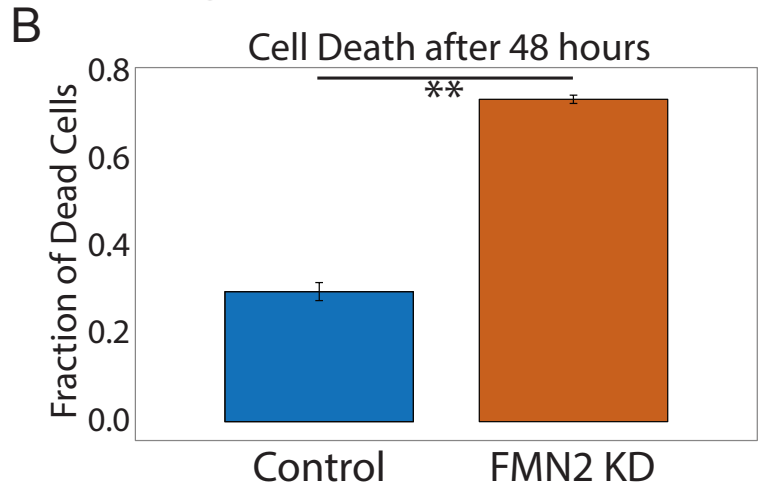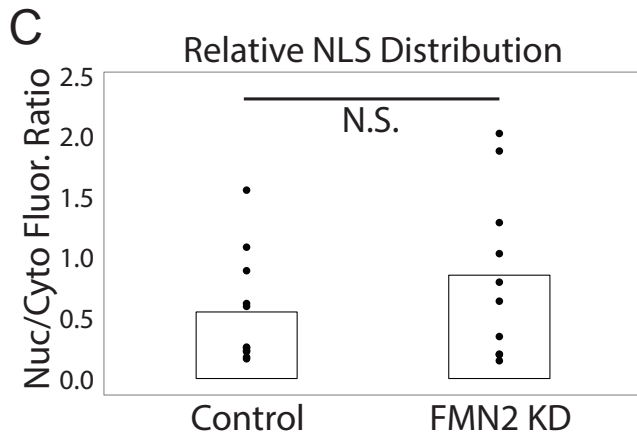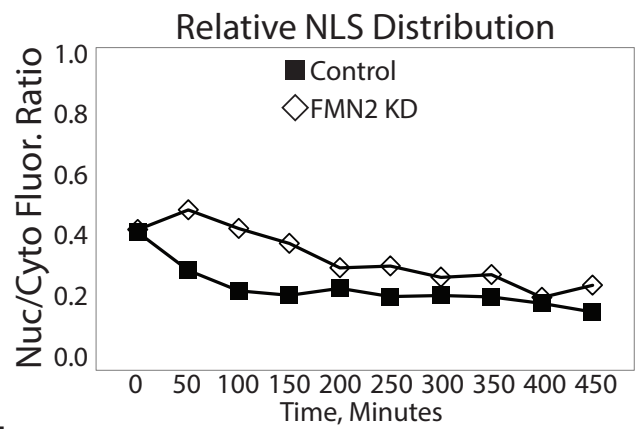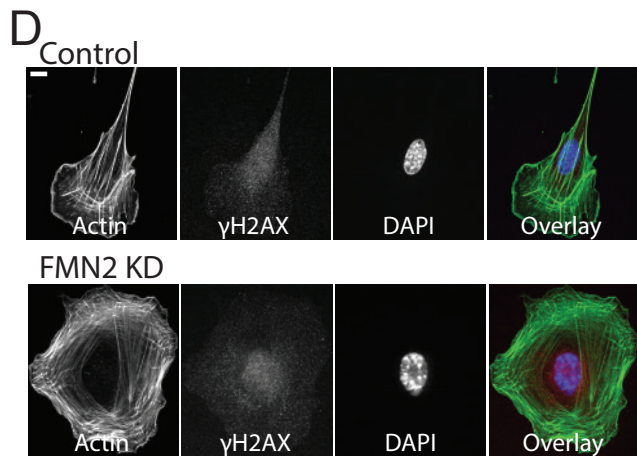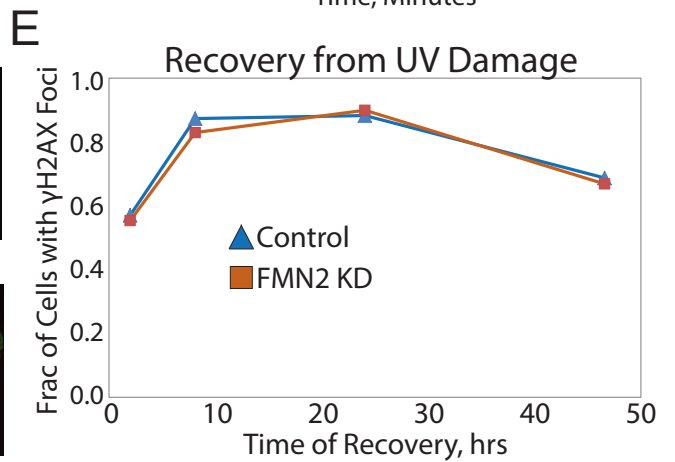

Supplement: NIHMS824113-supplement-13.pdf [file NIHMS824113-supplement-13.pdf]

# Supplemental Figure 1

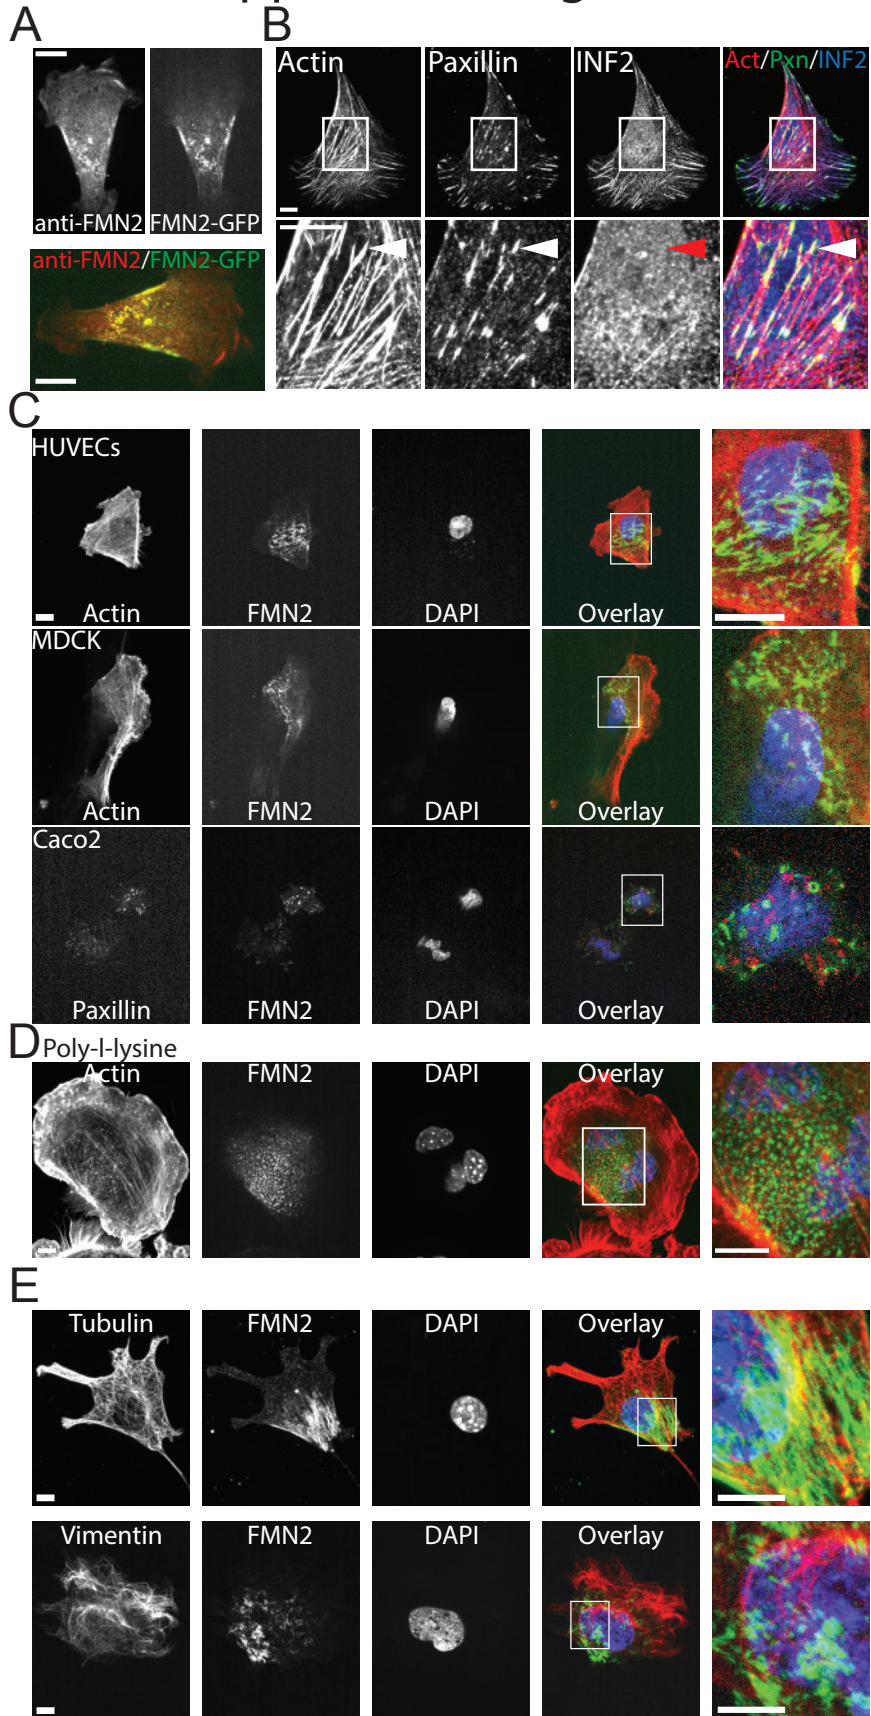

Supplement: NIHMS824113-supplement-8.pdf [file NIHMS824113-supplement-8.pdf]

# Supplemental Figure 2

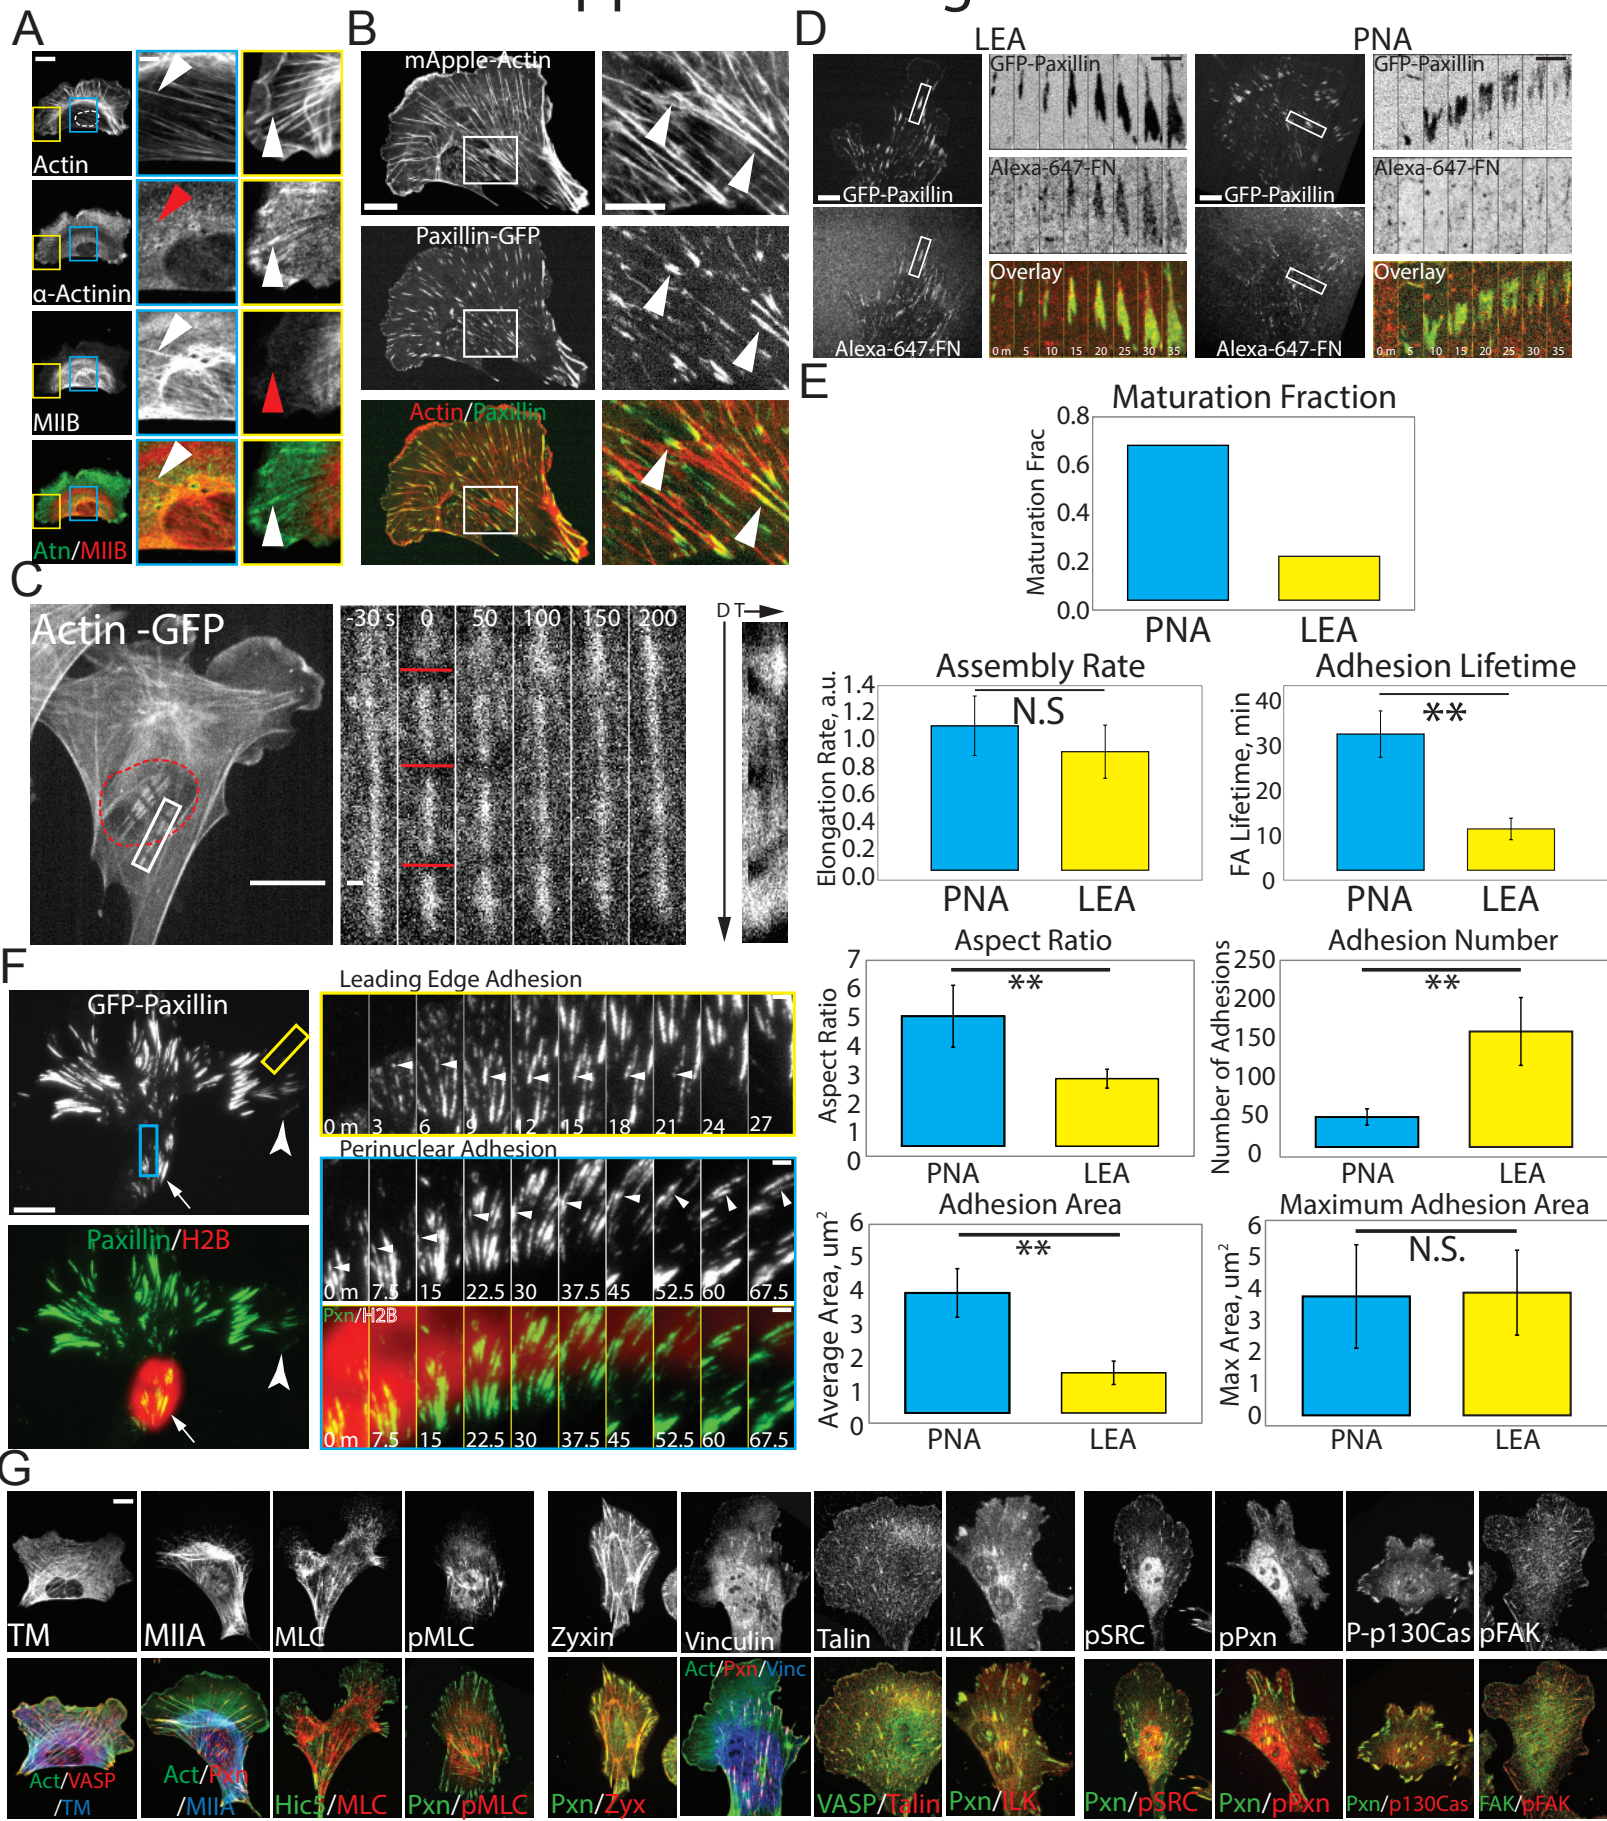

Supplement: NIHMS824113-supplement-9.pdf [file NIHMS824113-supplement-9.pdf]
